# Supplementary material for: Advancing wide implementation of precision oncology: A liquid nitrogen‐free snap freezer preserves molecular profiles of biological samples
Source: PubMed Central journal article supplement (PMC10225239; doi:10.1002/cam4.5781), 2023-03-14

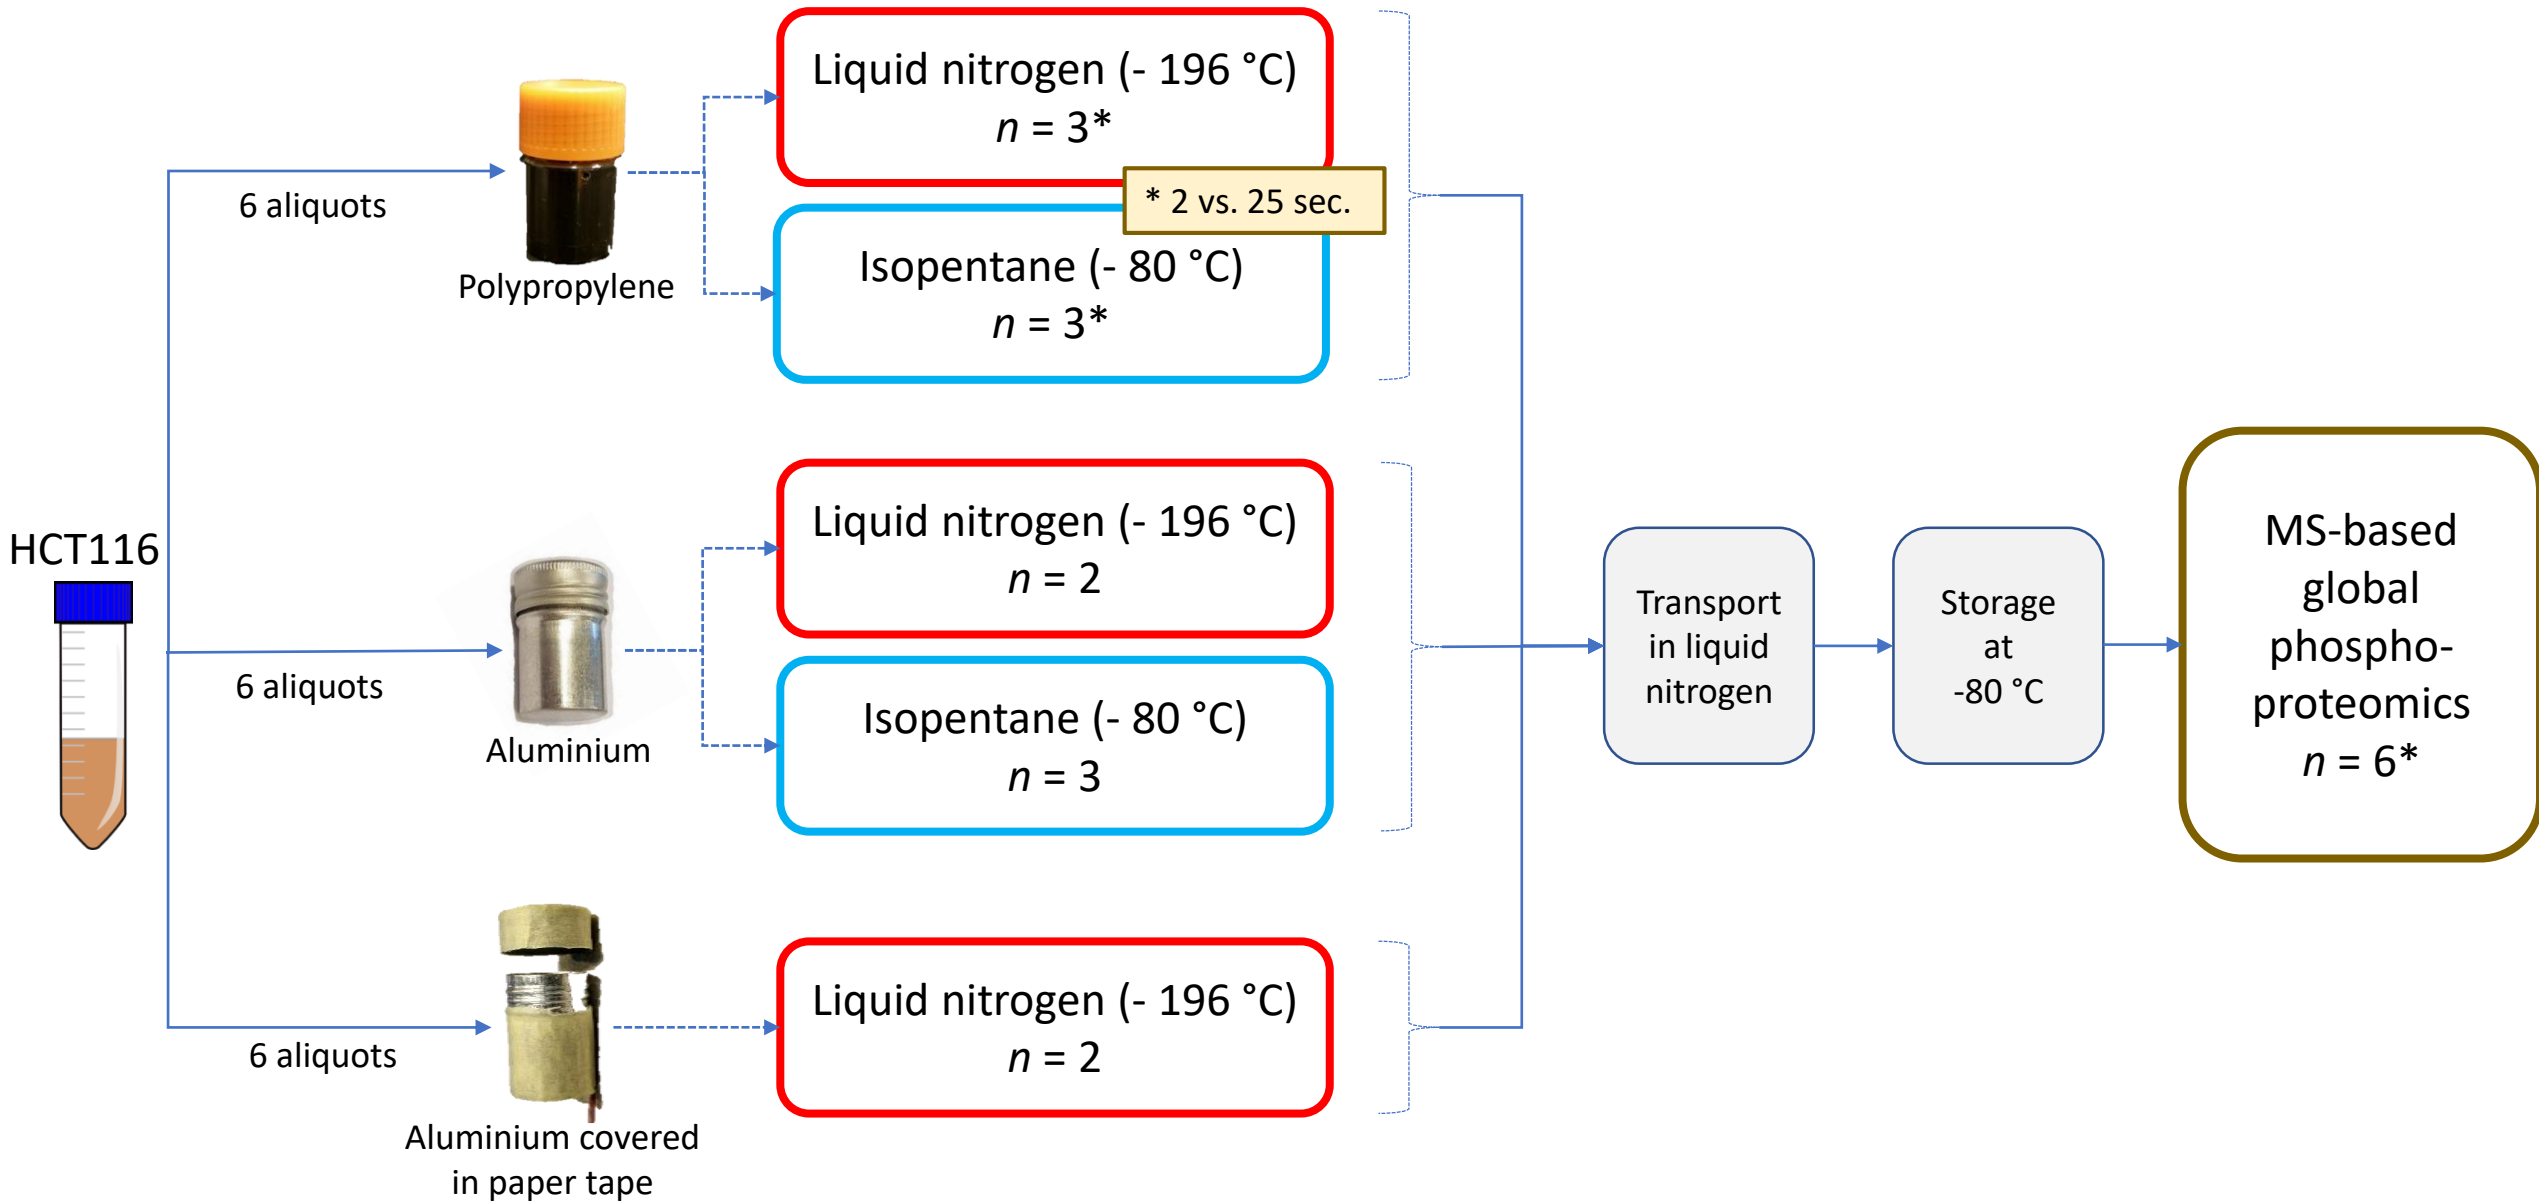

Supplement: CAM4-12-10979-s004.pdf [file CAM4-12-10979-s004.pdf]
